# Supplementary figures and images for: An Algorithm for Classifying Patients Most Likely to Develop Severe Coronavirus Disease 2019 Illness
Source: PubMed Central journal article supplement — Crit Care Explor. 2020 Dec 16;2(12):e0300. doi: 10.1097/CCE.0000000000000300 (PMC7746202; doi:10.1097/cce.0000000000000300), 2020-12-16

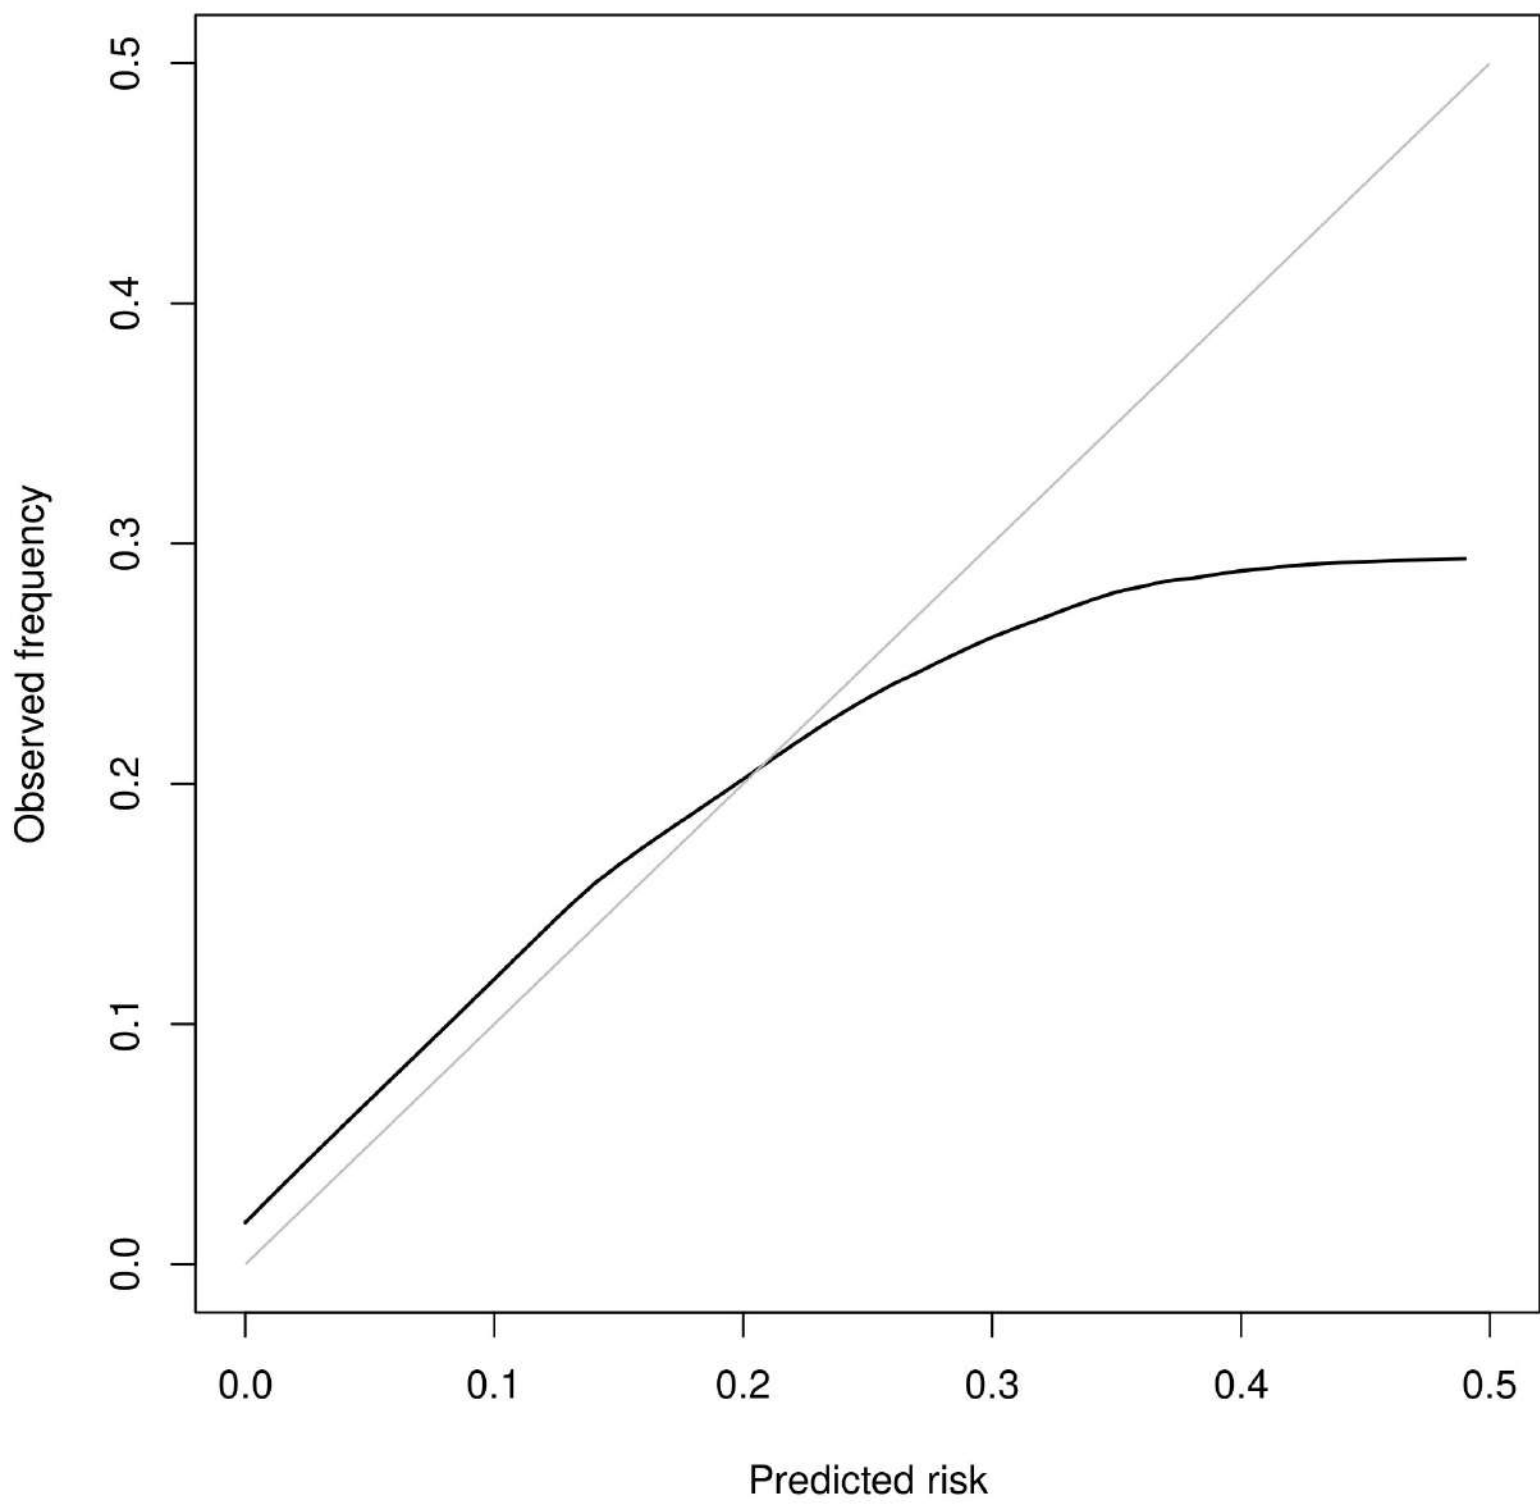

Supplement: cc9-2-e0300-s001.pdf [file cc9-2-e0300-s001.pdf]
